# Supplementary material for: Traditional Societal Practices Can Avert Poor Dietary Habits and Reduce Obesity Risk in Preschool Children of Mothers with Low Socioeconomic Status and Unemployment
Source: MDPI journal article supplement (doi:10.3390/bs11040042), 2021-03-24
Supplement: s1 [file s1]

## Supplementary materials

| Table S1. Energy reference values for girls according to their physical activity levels. |                                            |                                        |                    |                  |
|------------------------------------------------------------------------------------------|--------------------------------------------|----------------------------------------|--------------------|------------------|
| Age<br>(years)                                                                           | Energy Requirement (resting)<br>(kcal/day) | Total Energy Expenditure<br>(kcal/day) |                    |                  |
|                                                                                          |                                            | Low<br>activity                        | Medium<br>activity | High<br>activity |
| 4                                                                                        | 821                                        | 1157                                   | 1321               | N/A              |
| 5                                                                                        | 868                                        | 1224                                   | 1398               | 1571             |
| 6                                                                                        | 912                                        | 1286                                   | 1468               | 1651             |

| Table S2. Energy reference values for boys according to their physical activity levels. |                                            |                                        |                    |                  |
|-----------------------------------------------------------------------------------------|--------------------------------------------|----------------------------------------|--------------------|------------------|
| Age<br>(years)                                                                          | Energy Requirement (resting)<br>(kcal/day) | Total Energy Expenditure<br>(kcal/day) |                    |                  |
|                                                                                         |                                            | Low<br>activity                        | Medium<br>activity | High<br>activity |
| 4                                                                                       | 876                                        | 1235                                   | 1410               | N/A              |
| 5                                                                                       | 927                                        | 1307                                   | 1492               | 1677             |
| 6                                                                                       | 979                                        | 1380                                   | 1576               | 1772             |

| Table S3. Dietary reference values for protein intake. |                                     |                |                                     |
|--------------------------------------------------------|-------------------------------------|----------------|-------------------------------------|
| Boys                                                   |                                     | Girls          |                                     |
| Age<br>(years)                                         | Dietary Reference Values<br>(g/day) | Age<br>(years) | Dietary Reference Values<br>(g/day) |
| 4                                                      | 14                                  | 4              | 13.8                                |
| 5                                                      | 15.6                                | 5              | 15.5                                |
| 6                                                      | 18.2                                | 6              | 18                                  |

| Table S4. Reference values for vitamin intake for both sexes age 4-6 years. |     |
|-----------------------------------------------------------------------------|-----|
| Vitamin A ( $\mu\text{g}$ )                                                 | 300 |
| Vitamin C (mg)                                                              | 30  |
| Vitamin D ( $\mu\text{g}$ )                                                 | 15  |
| Vitamin E (mg)                                                              | 9   |
| Thiamine (mg)                                                               | 0.6 |
| Riboflavin (mg)                                                             | 0.6 |
| Niacin (mg)                                                                 | 6.7 |
| Pantothenic acid (mg)                                                       | 4   |
| Pyridoxine (mg)                                                             | 0.6 |
| Biotin ( $\mu\text{g}$ )                                                    | 25  |
| B <sub>12</sub> ( $\mu\text{g}$ )                                           | 1.5 |
| Folate ( $\mu\text{g}$ )                                                    | 140 |

Source: Turkish Ministry of Health, Turkey Dietary Guidelines, Ministry of Health of Turkey Publication No: 1046, Ankara 2016.
